# Supplementary material for: Broad complex Z2 regulates the group Ⅳ chitinase gene HaCHT4 in the midgut of Helicoverpa armigera (Hübner) (Lepidoptera: Noctuidae)
Source: Research Square preprint supplement (doi:10.21203/rs.3.rs-8610350/v1), 2026-01-28
Supplement: Supplementary file 1 [file 1aeb3548b85e8e454002e7e1.docx]

Table S1 Primers used in this study

| Purpose | Gene name | Primer name | Primer sequence (5'-3') |
| --- | --- | --- | --- |
| Promoter cloning | *HaCHT4* | SP1 | TTCTGTCTTAGCGTGGAATTGTTTG |
| SP2 | CTACCGCATTTTCGCTAGCCACAATA |
| RT-qPCR | *HaBRC Z2* | *HaBRC Z2*-QF | TGCGGGAAGGTTCTGTGC |
| *HaBRC Z2*-QR | CCTGTCCTCGACTTGTGGTAC |
| *HaCHT4* | *HaCHT4*-QF | CCTACGACGATGTGAACTCCATAAC |
| *HaCHT4*-QR | GCAGTGTTGATAGCAGAGTAAAGG |
| *β-actin* | *β-actin*-QF | TGCGGGAAGGTTCTGTGC |
| *β-actin*-QR | CCTGTCCTCGACTTGTGGTAC |
| RNAi | *HaBRC Z2* | ds*HaBRC Z2*-F | TAATACGACTCACTATAGGGAGACAATAACAACGAACAACCC |
| ds*HaBRC Z2*-R | TAATACGACTCACTATAGGGAACCAGTCAAAGAGGGATGC |
| *GFP* | ds*GFP*-F | TAATACGACTCACTATAGGGACAGTGCTTCAGCCGCTAC |
| ds*GFP*-R | TAATACGACTCACTATAGGGAGTTCACCTTGATGCCGTTC |

Note: The underlined sequence represents the T7 RNA polymerase promoter sequence.

Table S2 Nested PCR reaction procedure

| PCR steps | Cycles | Temperature & Duration |
| --- | --- | --- |
| SP1 | 5 | 95°C (1 min); 94°C (30 s) → 65°C (1 min) → 72°C (2 min) |
| 40 | 95°C (15 s) → 60°C (30 s) → 72°C (2 min) |
| SP2 | 15 | 94°C (30 s) → 62°C (1 min) → 72°C (2 min) |
| 15 | 94°C (30 s) → 44°C (1 min) → 72°C (2 min) |
| 1 | 72°C (10 min) |

Table S3 Basic information of BTB family proteins

| Rename | Gene ID | Number of Amino Acid | Molecular Weight | Theoretical pI | Instability Index | Aliphatic Index | Grand Average of Hydropathicity | Subcellular Localization |
| --- | --- | --- | --- | --- | --- | --- | --- | --- |
| HaABTB1 | LOC110371202 | 1234 | 138307.30 | 8.40 | 45.69 | 85.43 | -0.356 | Nuclear |
| HaABTB2 | LOC110370878 | 1183 | 127884.1 | 5.57 | 36.87 | 94.69 | -0.154 | Cytoplasmic |
| HaBBK1 | LOC110374871 | 638 | 72075.33 | 5.52 | 42.66 | 90.94 | -0.287 | Nuclear |
| HaBBK2 | LOC110369920 | 588 | 65068.18 | 6.08 | 43.56 | 91.41 | -0.163 | Nuclear |
| HaBBK3 | LOC110372548 | 1239 | 141495.80 | 8.38 | 49.98 | 71.92 | -0.515 | Nuclear |
| HaBBK4 | LOC110375210 | 1287 | 135622.80 | 8.70 | 58.25 | 82.64 | -0.181 | Nuclear |
| HaBBK5 | LOC126056157 | 642 | 67472.07 | 8.29 | 57.28 | 87.87 | -0.054 | Nuclear |
| HaBBK6 | LOC110375607 | 799 | 90445.17 | 6.54 | 51.17 | 83.17 | -0.269 | Plasma Membrane |
| HaBBP1 | LOC110379071 | 507 | 56458.02 | 5.08 | 33.78 | 85.38 | -0.201 | Cytoplasmic |
| HaBBP2 | LOC110380429 | 590 | 65348.11 | 5.68 | 48.02 | 79.71 | -0.168 | Mitochondrial |
| HaBBTB1 | LOC110379386 | 1739 | 191896.6 | 6.36 | 52.42 | 75.08 | -0.554 | Plasma Membrane |
| HaBBTB2 | LOC110380553 | 645 | 71723.88 | 5.90 | 48.77 | 82.22 | -0.152 | Cytoplasmic |
| HaBBTB3 | LOC126055061 | 345 | 39489.03 | 4.86 | 38.45 | 89.86 | -0.169 | Cytoplasmic |
| HaBBTB4 | LOC110381200 | 610 | 67791.08 | 5.81 | 52.03 | 82.13 | -0.284 | Nuclear |
| HaBBTB5 | LOC110376995 | 591 | 65191.01 | 6.48 | 56.61 | 83.79 | -0.248 | Cytoplasmic and nuclear |
| HaBBTB6 | LOC110370251 | 609 | 66488.97 | 6.18 | 48.99 | 89.69 | -0.051 | Nuclear |
| HaBBTB7 | LOC110372258 | 359 | 40110.05 | 6.67 | 49.62 | 88.58 | -0.208 | Nuclear |
| HaBBTB8 | LOC110374871 | 638 | 72075.33 | 5.52 | 42.66 | 90.94 | -0.287 | Nuclear |
| HaBBTB9 | LOC110375966 | 489 | 53665.22 | 5.98 | 38.46 | 85.48 | -0.087 | Cytoplasmic |
| HaBBTB10 | LOC110378080 | 398 | 43967.29 | 5.73 | 63.61 | 92.34 | -0.239 | Cytoplasmic |
| HaBBTB11 | LOC110377969 | 628 | 71546.66 | 6.91 | 42.77 | 80.27 | -0.262 | Nuclear |
| HaBBTB12 | LOC110384382 | 666 | 75426.00 | 5.45 | 51.52 | 85.69 | -0.221 | Nuclear |
| HaBBTB13 | LOC110371681 | 599 | 68273.95 | 5.65 | 43.76 | 86.19 | -0.218 | Nuclear |
| HaBBTB14 | LOC110383061 | 339 | 39091.88 | 5.82 | 34.58 | 96.67 | -0.293 | Cytoplasmic |
| HaBBTB15 | LOC110382872 | 1420 | 152568.40 | 9.76 | 47.00 | 84.65 | -0.171 | Cytoplasmic |
| HaBTBD1 | LOC110378022 | 387 | 43251.83 | 6.29 | 55.77 | 68.84 | -0.607 | Nuclear |
| HaBTBD2 | LOC110377571 | 423 | 46867.22 | 8.26 | 62.37 | 61.82 | -0.684 | Nuclear |
| HaBTBD3 | LOC110377815 | 173 | 20291.21 | 7.14 | 45.31 | 77.17 | -0.573 | Cytoplasmic |
| HaBTBD4 | LOC110374605 | 628 | 71490.58 | 5.51 | 54.30 | 88.98 | -0.205 | Plasma Membrane |
| HaBTBD5 | LOC110377077 | 217 | 25273.29 | 5.16 | 50.50 | 80.78 | -0.691 | Cytoplasmic |
| HaBTBD6 | LOC110383758 | 566 | 63195.71 | 6.50 | 60.31 | 67.93 | -0.741 | Nuclear |
| HaBTBD7 | LOC110370508 | 543 | 59939.62 | 5.99 | 57.80 | 72.60 | -0.564 | Nuclear |
| HaBTBD8 | LOC110384143 | 714 | 80757.92 | 9.24 | 48.12 | 67.98 | -0.535 | Nuclear |
| HaBTBD9 | LOC110384113 | 477 | 52673.20 | 6.40 | 50.03 | 73.98 | -0.538 | Nuclear |
| HaBTBD10 | LOC110377462 | 573 | 63929.82 | 5.93 | 62.24 | 69.65 | -0.678 | Nuclear |
| HaBTBD11 | LOC110374654 | 349 | 39676.61 | 6.55 | 31.49 | 87.94 | -0.185 | Cytoplasmic |
| HaBTBD12 | LOC135116971 | 662 | 72907.54 | 5.98 | 53.61 | 61.07 | -0.869 | Nuclear |
| HaBTBD13 | LOC110380998 | 672 | 73802.67 | 5.86 | 52.59 | 61.62 | -0.844 | Nuclear |
| HaBTBD14 | LOC110380998 | 663 | 72954.70 | 5.86 | 53.55 | 60.98 | -0.868 | Nuclear |
| HaBTBD15 | LOC110381096 | 451 | 49446.29 | 9.06 | 63.84 | 54.01 | -0.789 | Nuclear |
| HaBTBD16 | LOC110381096 | 448 | 49189.04 | 9.14 | 64.39 | 54.15 | -0.79 | Nuclear |
| HaBTBD17 | LOC110371926 | 449 | 51956.77 | 5.98 | 38.24 | 98.73 | -0.082 | Cytoplasmic |
| HaBTBD18 | LOC110371966 | 320 | 36514.09 | 5.86 | 51.18 | 71.88 | -0.634 | Nuclear |
| HaBTBD19 | LOC110371056 | 447 | 49778.91 | 6.11 | 46.31 | 81.74 | -0.601 | Nuclear |
| HaBTBD20 | LOC126053462 | 233 | 26328.57 | 6.19 | 35.35 | 72.88 | -0.55 | Cytoplasmic |
| HaBTBD21 | LOC110372773 | 1080 | 119639.20 | 5.86 | 45.75 | 95.87 | -0.183 | Nuclear |
| HaBTBD22 | LOC110369927 | 292 | 32891.53 | 6.34 | 52.29 | 86.47 | -0.358 | Cytoplasmic |
| HaBTBD23 | LOC110372595 | 552 | 60778.55 | 5.62 | 52.38 | 65.49 | -0.685 | Nuclear |
| HaBTBD24 | LOC110372595 | 546 | 60057.71 | 5.54 | 52.90 | 65.49 | -0.693 | Nuclear |
| HaBTBD25 | LOC110372361 | 162 | 18439.93 | 4.36 | 46.05 | 83.02 | -0.57 | Cytoplasmic |
| HaBTBD26 | LOC110375960 | 370 | 41467.60 | 6.19 | 75.44 | 63.59 | -0.777 | Nuclear |
| HaBTBD27 | LOC110379625 | 900 | 99320.92 | 6.38 | 51.97 | 79.82 | -0.357 | Plasma Membrane |
| HaBTBD28 | LOC110384046 | 840 | 93993.13 | 4.62 | 53.67 | 78.10 | -0.676 | Nuclear |
| HaBTBD29 | LOC110384377 | 327 | 37265.78 | 5.14 | 39.33 | 85.81 | -0.522 | Cytoplasmic |
| HaBTBD30 | LOC110380888 | 410 | 45294.08 | 7.42 | 63.94 | 63.63 | -0.605 | Nuclear |
| HaBTBD31 | LOC110379733 | 315 | 34872.16 | 6.15 | 39.89 | 96.10 | -0.107 | Cytoplasmic |
| HaBTBD32 | LOC110384284 | 1494 | 168862.50 | 4.64 | 59.59 | 77.55 | -0.709 | Nuclear |
| HaBTBD33 | LOC110376725 | 621 | 70593.43 | 7.92 | 43.12 | 86.18 | -0.178 | Plasma Membrane |
| HaBTBD34 | LOC110376737 | 662 | 74177.30 | 5.92 | 46.88 | 99.08 | -0.07 | Plasma Membrane |
| HaBTBD35 | LOC110376709 | 719 | 80234.94 | 5.93 | 51.55 | 68.32 | -0.743 | Nuclear |
| HaBTBD36 | LOC110377459 | 578 | 66121.11 | 5.71 | 42.58 | 93.91 | -0.152 | Cytoplasmic |
| HaBTBD37 | LOC110373447 | 661 | 72155.49 | 8.11 | 40.48 | 80.38 | -0.266 | Nuclear |
| HaBTBD38 | LOC110377143 | 406 | 44343.46 | 5.27 | 35.65 | 93.25 | -0.175 | Mitochondrial |
| HaBTBD39 | LOC110370789 | 851 | 96786.79 | 8.90 | 57.14 | 69.79 | -0.68 | Nuclear |
| HaBTBD40 | LOC110383328 | 278 | 30960.11 | 8.18 | 50.63 | 86.98 | -0.413 | Nuclear |
| HaBTBD41 | LOC110383328 | 278 | 30960.11 | 8.18 | 50.63 | 86.98 | -0.413 | Nuclear |
| HaBTBD42 | LOC110377621 | 128 | 14574.91 | 7.73 | 53.01 | 80.78 | -0.273 | Cytoplasmic |
| HaBTBD43 | LOC110379554 | 154 | 16143.04 | 4.81 | 41.97 | 72.34 | -0.117 | Cytoplasmic and nuclear |
| HaBTBD44 | LOC110372654 | 613 | 68280.28 | 8.45 | 44.02 | 82.15 | -0.132 | Plasma Membrane |
| HaBTBD45 | LOC110376192 | 381 | 43898.24 | 5.47 | 51.44 | 66.22 | -0.813 | Nuclear |
| HaBTBD46 | LOC110377829 | 439 | 48732.56 | 5.76 | 61.14 | 67.79 | -0.658 | Nuclear |
| HaBTBD47 | LOC110382039 | 696 | 76298.93 | 6.26 | 45.31 | 75.00 | -0.595 | Nuclear |
| HaBTB-ZF1 | LOC110383294 | 448 | 49840.60 | 7.75 | 61.15 | 66.41 | -0.753 | Nuclear |
| HaBTB-ZF2 | LOC110373894 | 818 | 93003.76 | 6.73 | 58.49 | 63.69 | -0.921 | Nuclear |
| HaBTB-ZF3 | LOC110384388 | 344 | 39595.59 | 6.24 | 54.91 | 72.56 | -0.792 | Cytoplasmic |
| HaBTB-ZF4 | LOC110370686 | 403 | 45235.15 | 6.54 | 53.76 | 75.93 | -0.476 | Nuclear |
| HaBTB-ZF5 | LOC135117716 | 364 | 40396.49 | 6.00 | 43.56 | 84.59 | -0.388 | Cytoplasmic and nuclear |
| HaBTB-ZF6 | LOC110377185 | 634 | 71199.81 | 5.22 | 44.91 | 69.02 | -0.635 | Nuclear |
| HaBTB-ZF7 | LOC110378827 | 419 | 48381.89 | 5.87 | 37.24 | 69.50 | -0.857 | Nuclear |
| HaHBTB1 | LOC110376628 | 551 | 59867.64 | 6.71 | 63.27 | 70.22 | -0.504 | Nuclear |
| HaHBTB2 | LOC110372381 | 498 | 54790.76 | 8.77 | 73.48 | 67.03 | -0.616 | Nuclear |
| HaHBTB3 | LOC110375819 | 500 | 55796.09 | 8.47 | 68.13 | 61.28 | -0.799 | Nuclear |
| HaMBTB | LOC110383902 | 352 | 39890.82 | 6.22 | 33.78 | 87.33 | -0.239 | Cytoplasmic |
| HaRhoBTB1 | LOC135118336 | 738 | 84840.75 | 8.26 | 47.12 | 83.10 | -0.292 | Extracellular |
| HaRhoBTB2 | LOC110381093 | 745 | 85424.19 | 8.26 | 45.92 | 84.16 | -0.279 | Extracellular |

**Figure S1: Methods**

**Chromosomal mapping of the BTB gene family**

The chromosomal location data of the HaBTB genes in *H. armigera* were obtained from the NCBI GenBank database, along with the corresponding genome annotation files. The distribution of HaBTB genes on their chromosomes was visualized using MapChart software (<https://www.wur.nl/en/show/Mapchart.htm>).

**Results**

**Analysis of the chromosomal localization of the BTB gene family**

**
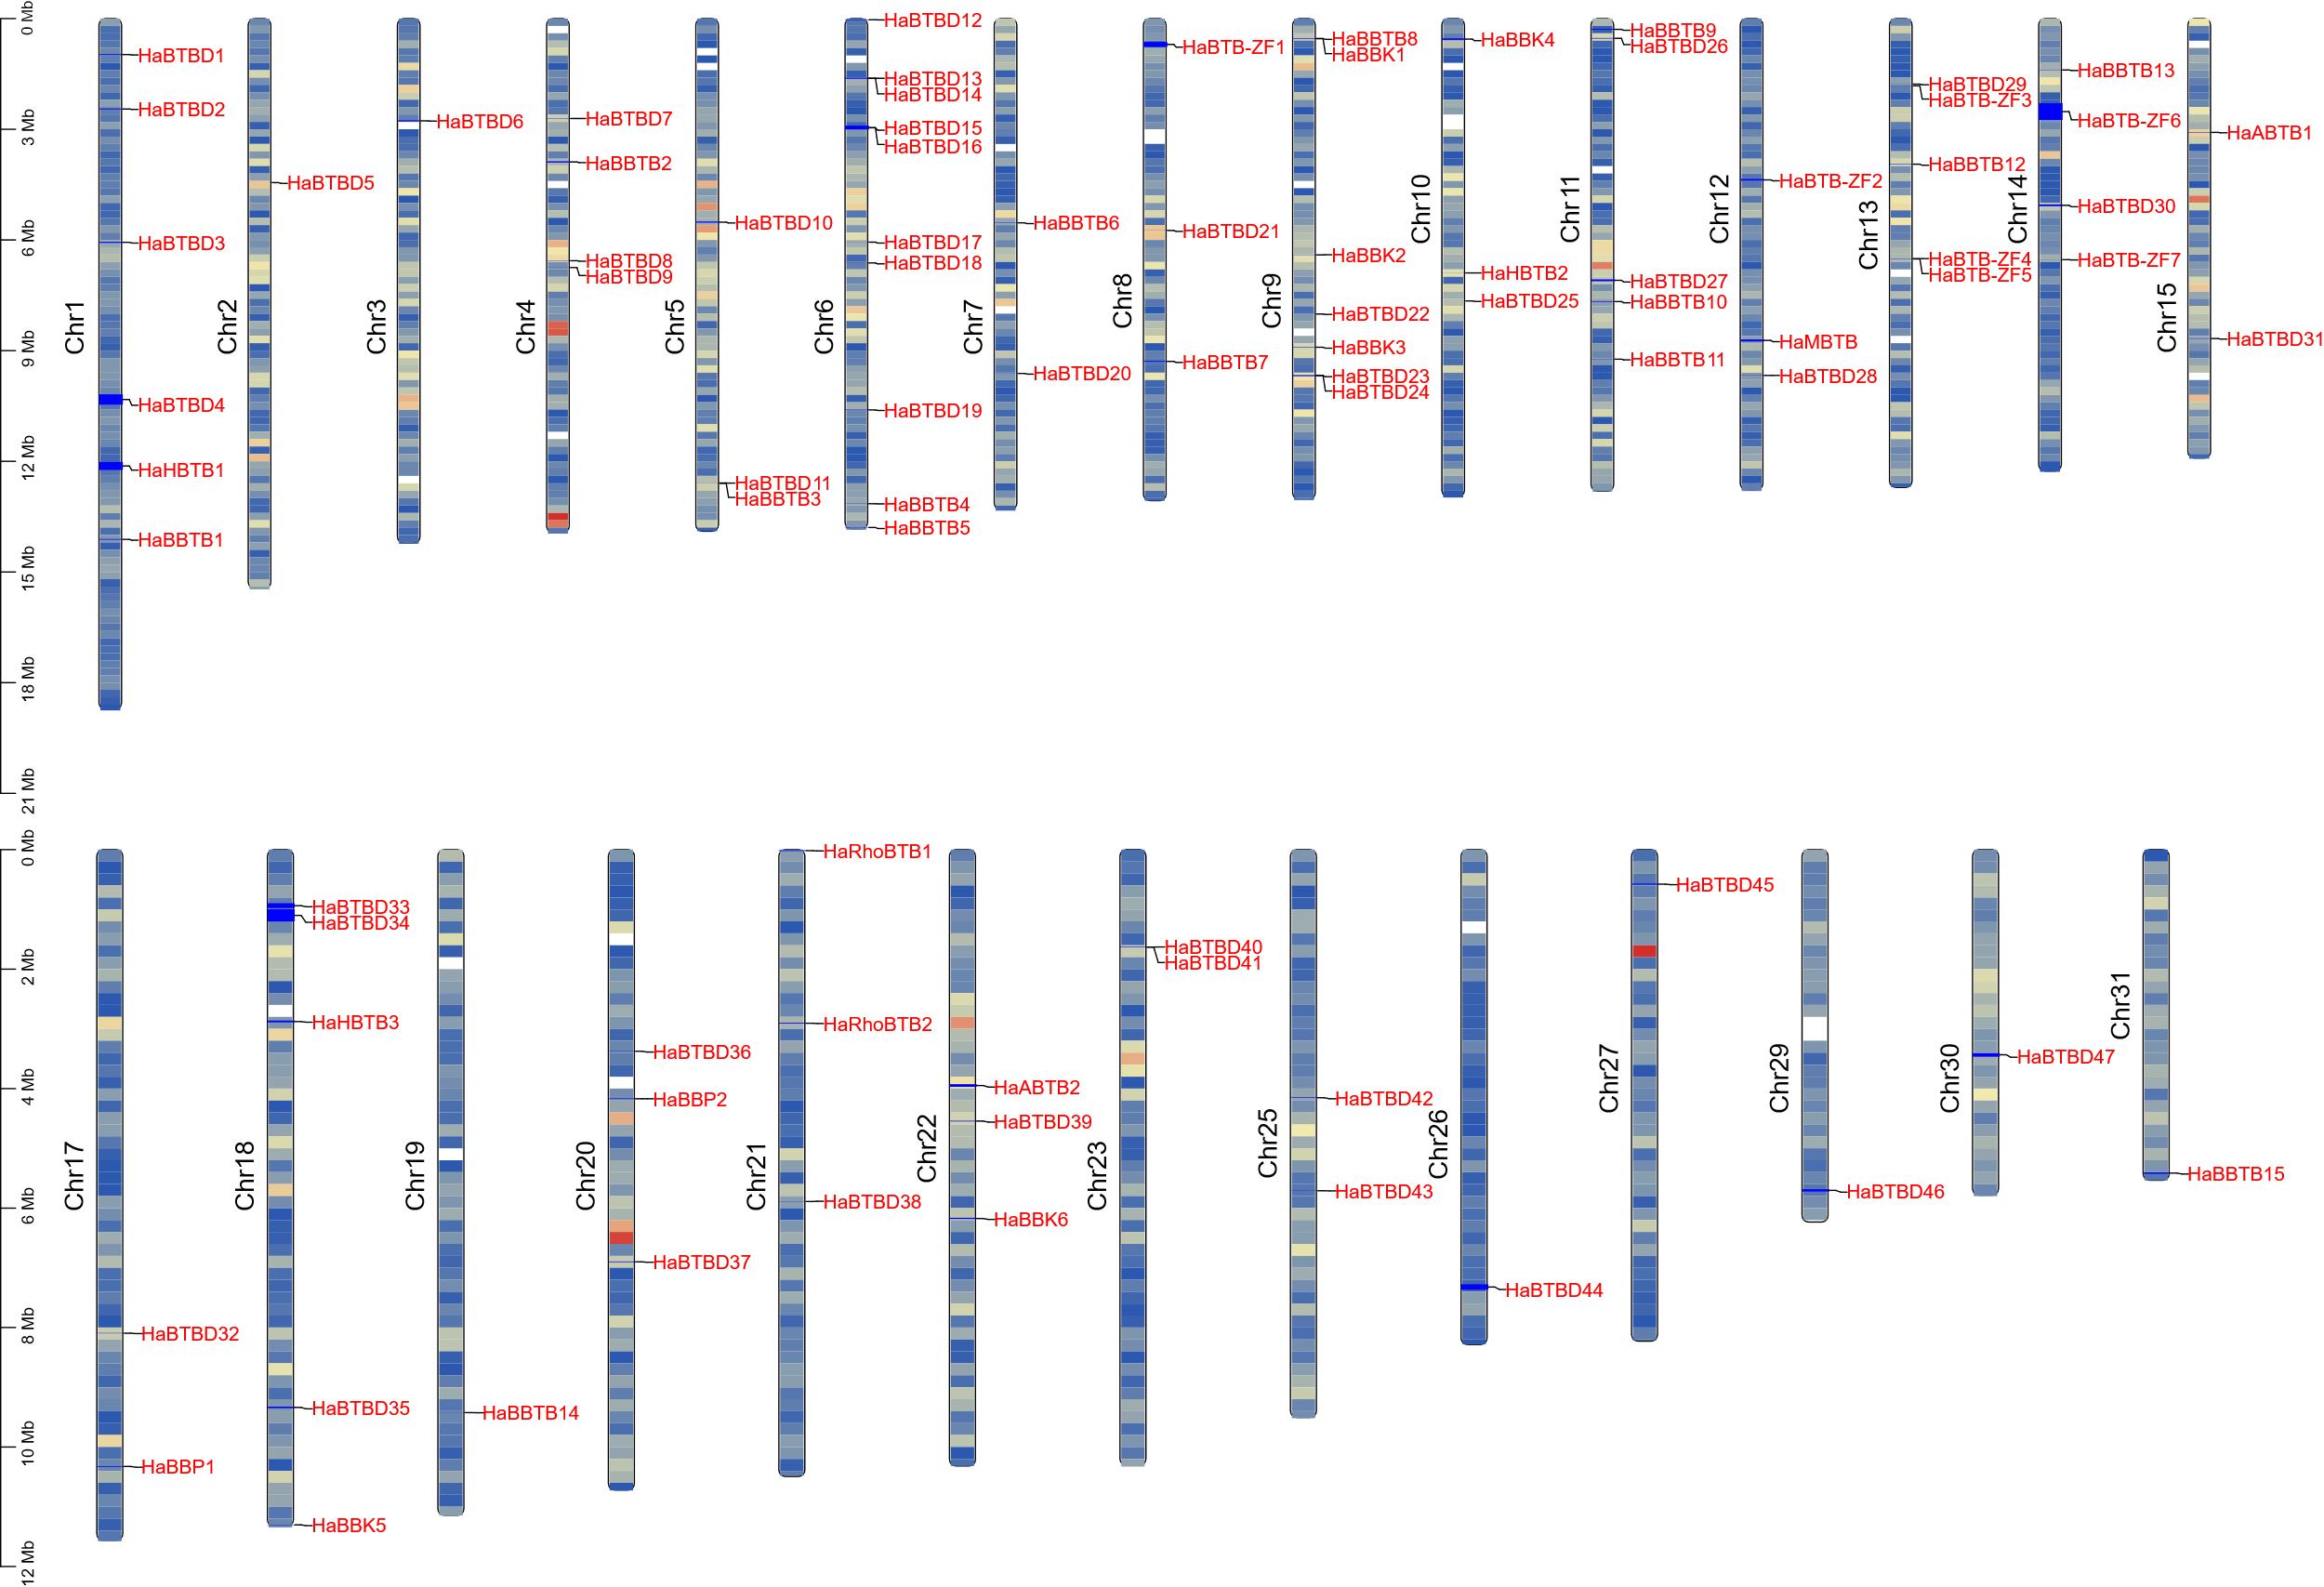
**Figure S1 depicts the relationship between the chromosomal location of the HaBTB gene family. Members of the HaBTB family were unevenly distributed across the 28 chromosomes. Chromosome 6 harbored the highest number of HaBTB genes (10 genes), while chromosome 2, 3, 19, 26, 17, 19, 30, and 31 had the lowest number (1 gene each). These genes were mostly located relatively close to the telomeric region of the chromosome.

**Figure S1.** Schematic depictions of the chromosomal distribution of HaBTB genes. The chromosome number is indicated to the left of each chromosome.
