# Supplementary material for: Broad complex Z2 regulates the group Ⅳ chitinase gene HaCHT4 in the midgut of Helicoverpa armigera (Hübner) (Lepidoptera: Noctuidae)
Source: Research Square preprint supplement (doi:10.21203/rs.3.rs-8610350/v1), 2026-01-28
Supplement: Supplementary file 2 [file 1b0ffcedf006cc0e53502e94.docx]

**Broad complex Z2 regulates the group Ⅳ chitinase gene *HaCHT4* in the midgut of *Helicoverpa armigera* (Hübner) (Lepidoptera: Noctuidae)**


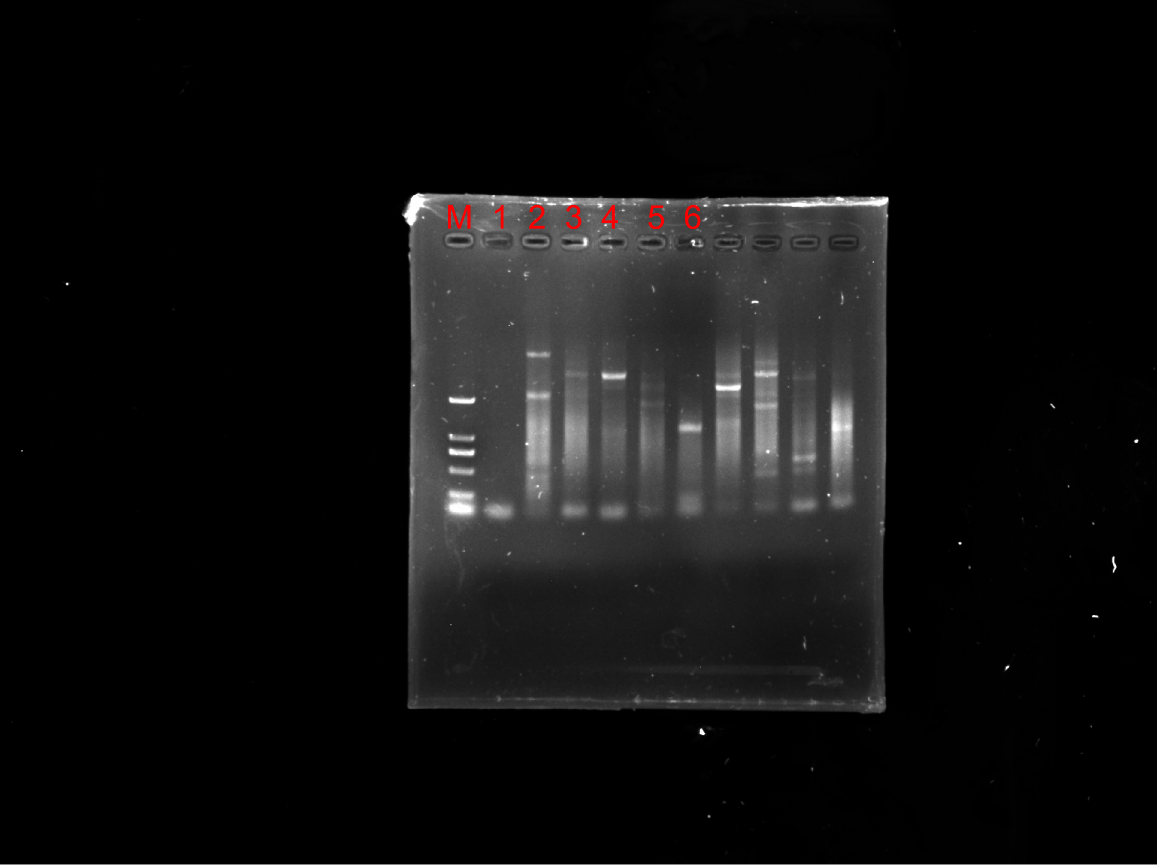
**Supplementary -raw-images:**

**Figure 1A-raw image.** Amplification of the *HaCHT4* promoter sequence. M, DNA 2000 Marker; 1-3, PCR products of Primer SP1 from round 1 to round 3; 4-6, PCR products of Primer SP2 from round 1 to round 3.

**
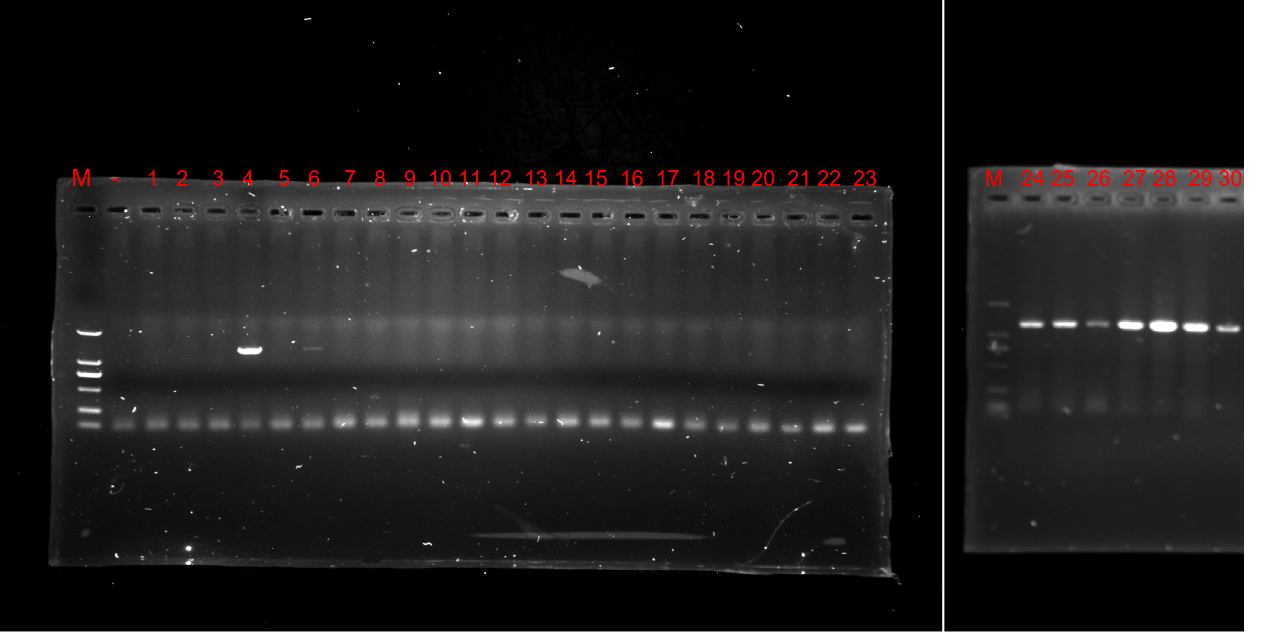
Figure 1B-raw image.** pEASY-T1-*HaCHT4* monoclonal PCR. M, DNA 2000 Marker; -, negative control; 1-30: different monoclonal samples.

**
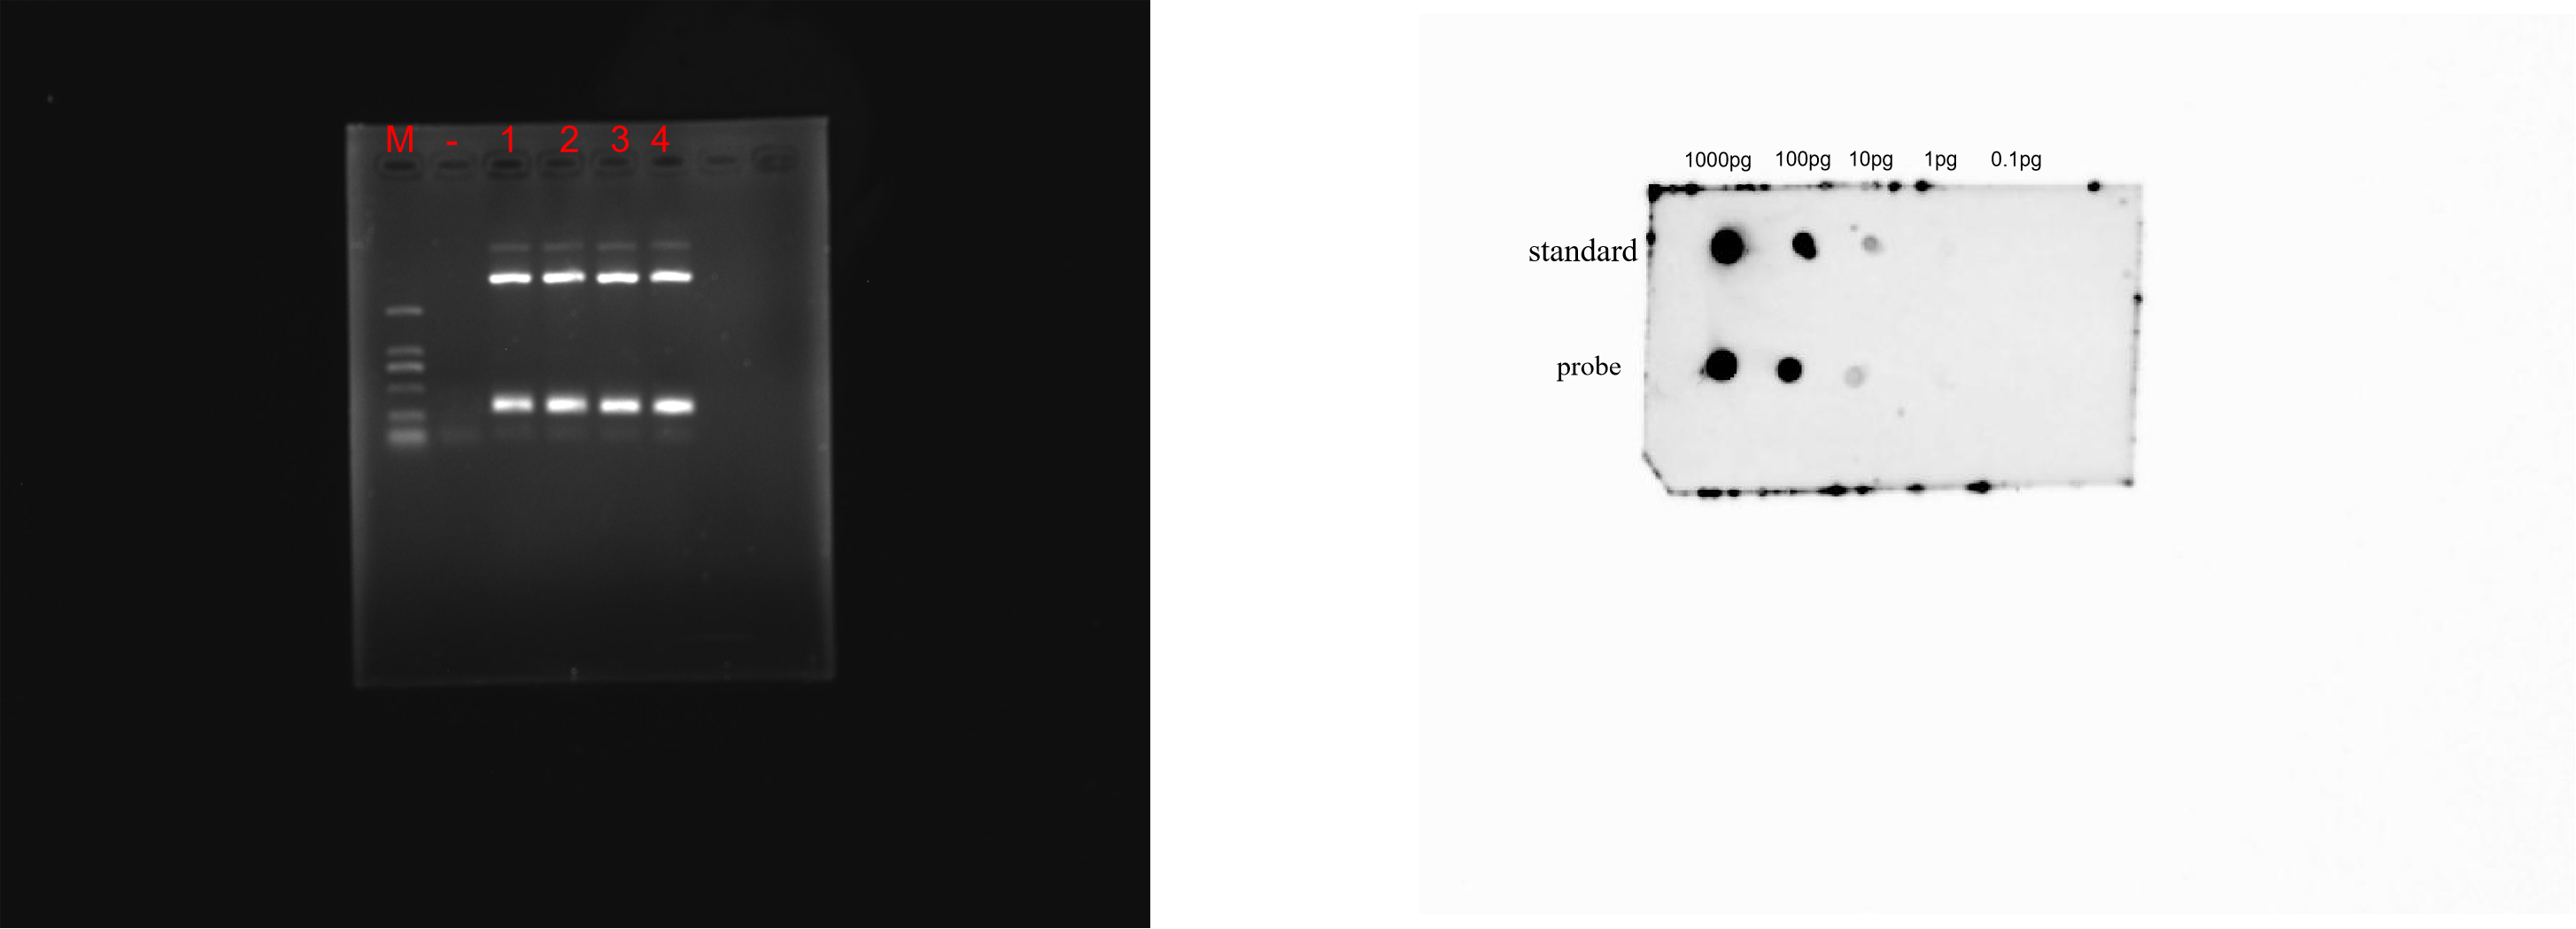
**

**Figure 5C-raw image.** Detection of probe synthesis and labeling efficiency. M, DNA 2000 Marker; -, negative control; 1-4, probe synthesis.


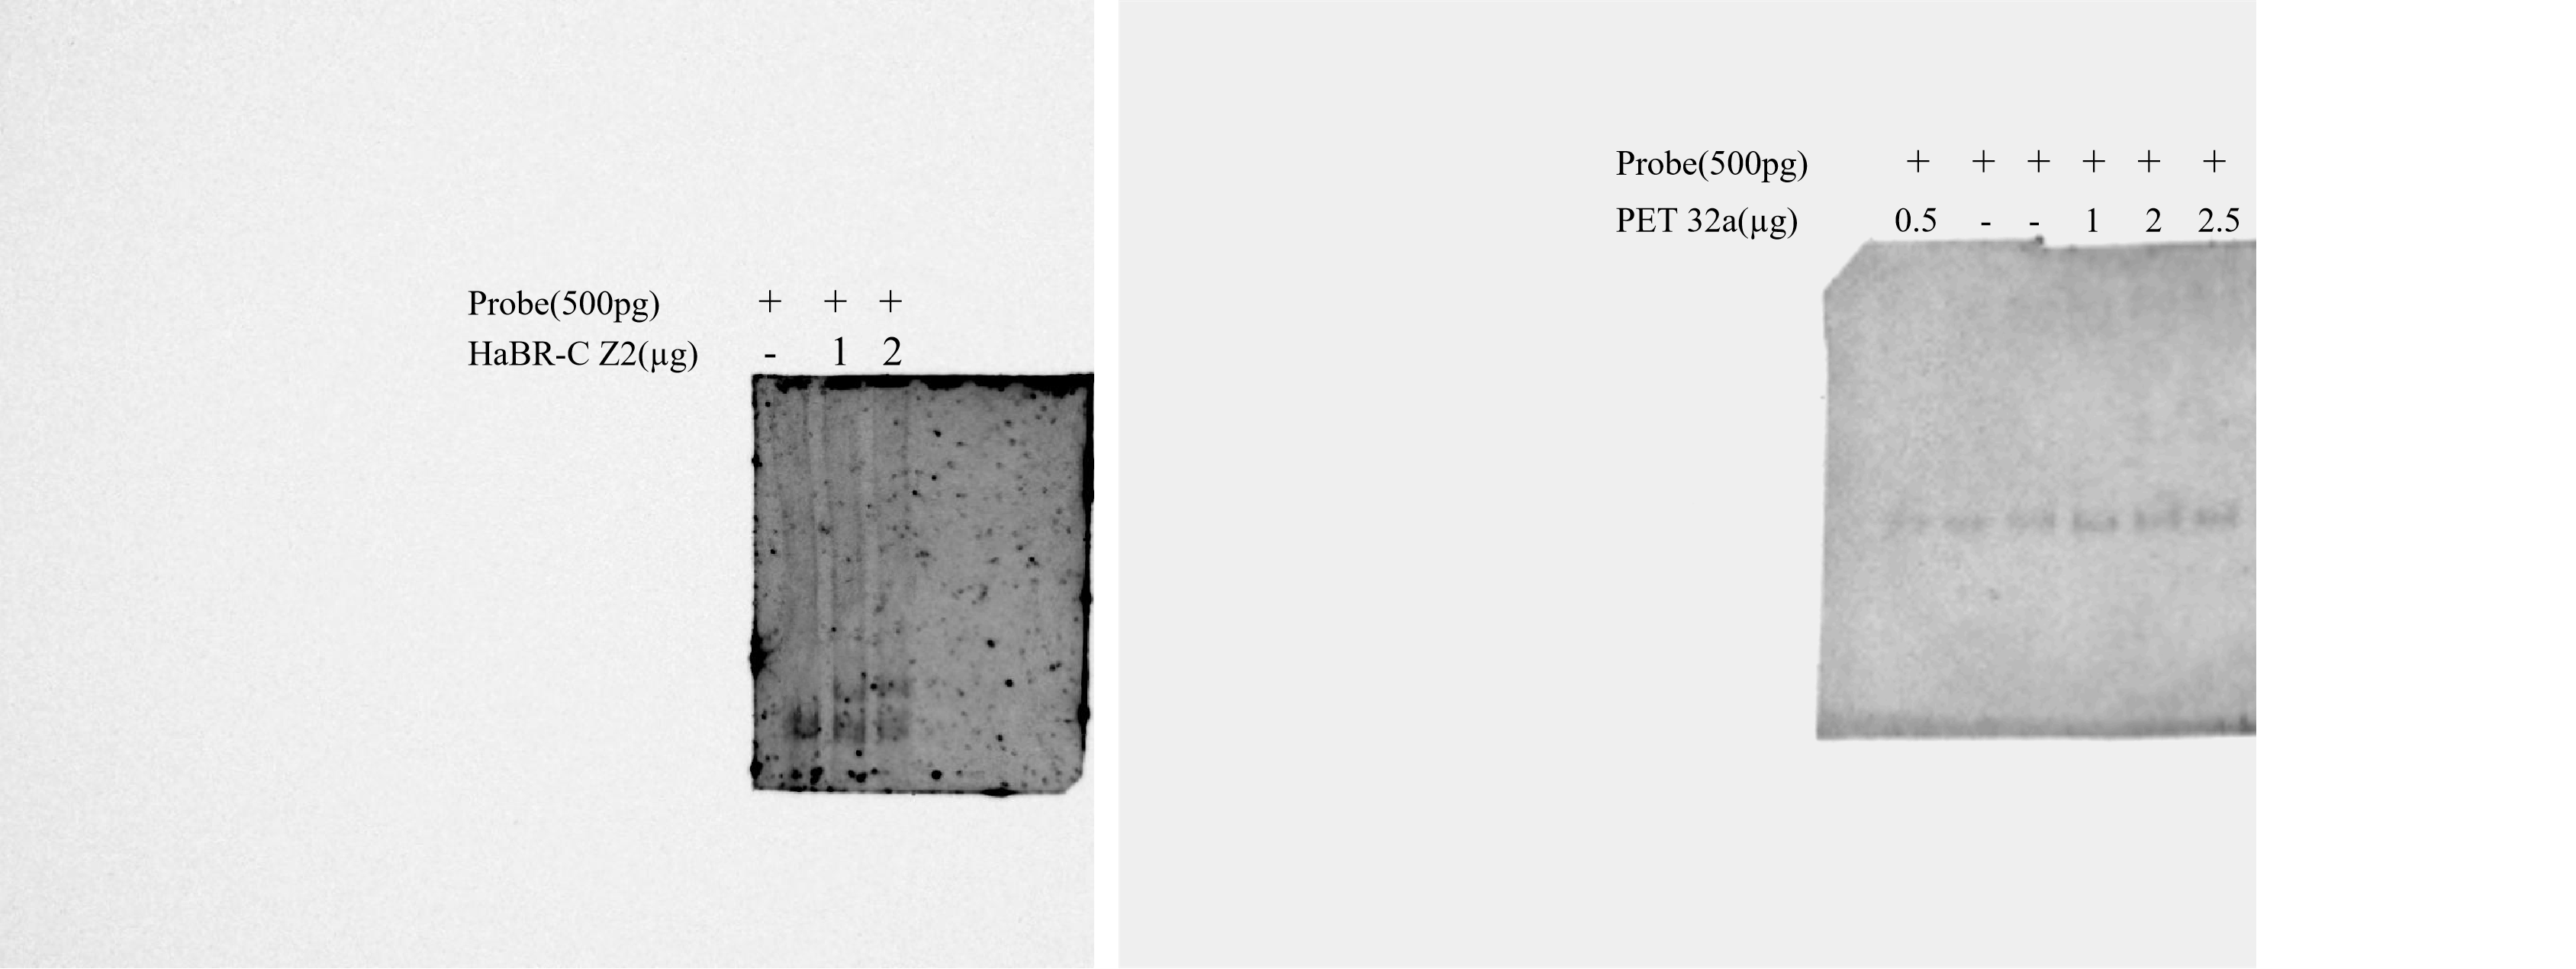


**Figure 5D-raw image.** EMSA analysis of the binding of HaBRC Z2 to the *HaCHT4* promoter CREs.
